# Supplementary material
Source: PubMed Central journal article supplement (PMC3197749)
Supplement: NIHMS311919-supplement-Supp1.pdf [file NIHMS311919-supplement-Supp1.pdf]

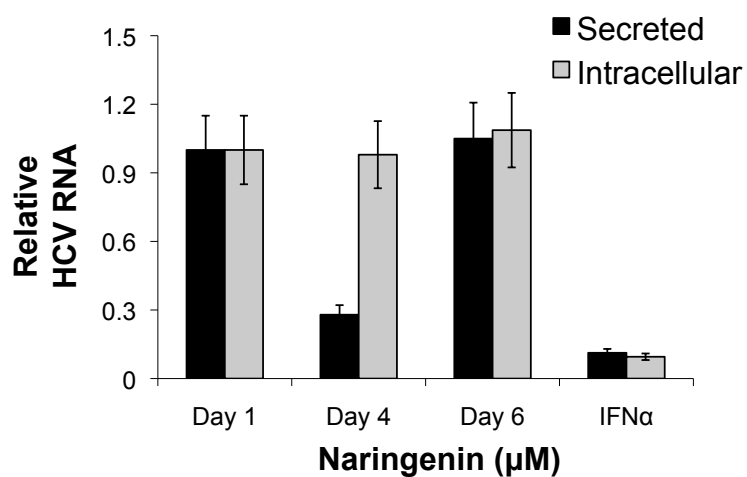

**Figure 1S.** Intracellular and secreted HCV RNA during long term treatment of chronically infected Huh7.5.1 cells with 200  $\mu$ M naringenin or 1000 i.u. IFN $\alpha$ . Treatment was carried out for 4 days, followed by washout. Naringenin treatment did not affect intracellular HCV levels during the course of the experiment. Intracellular levels of HCV RNA were reduced by IFN $\alpha$  treatment (day 6).
